# Supplementary material
Source: PubMed Central journal article supplement (PMC1595440)

**A**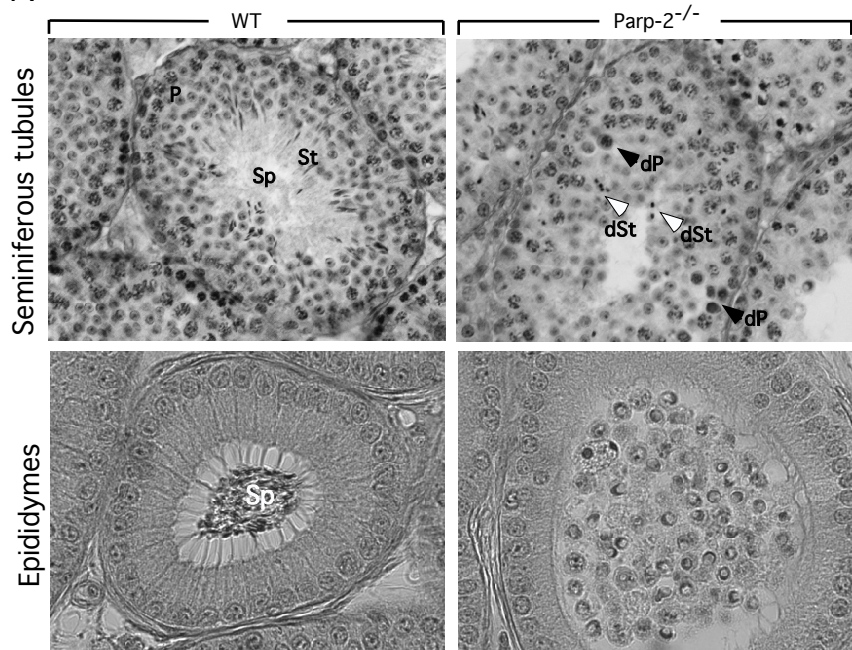**B**

IP

TUNEL

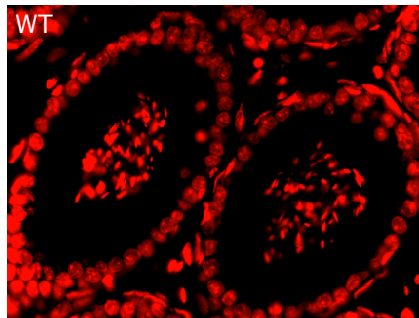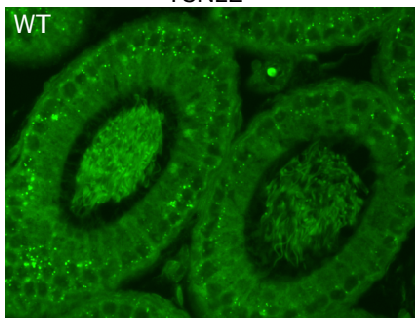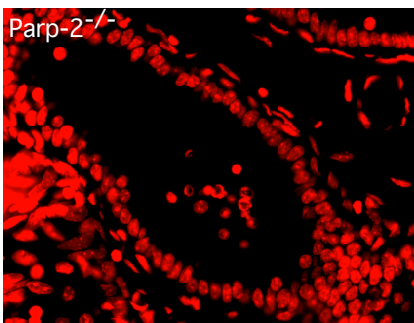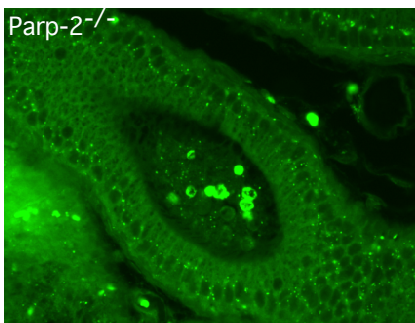

Supplement: pnas_0604252103_1.pdf [file pnas_0604252103_1.pdf]

A.

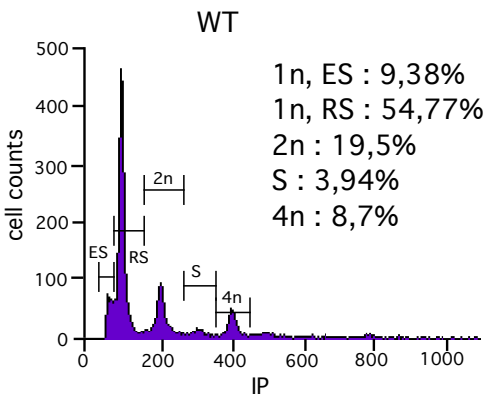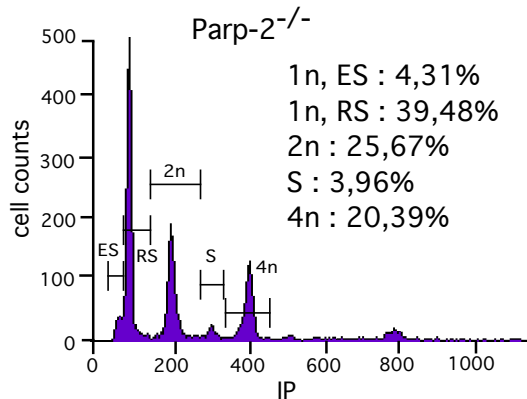

B.

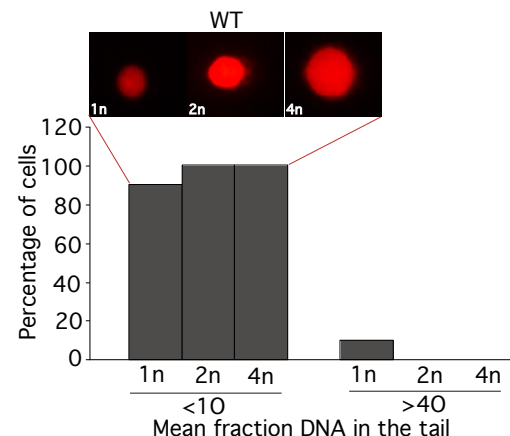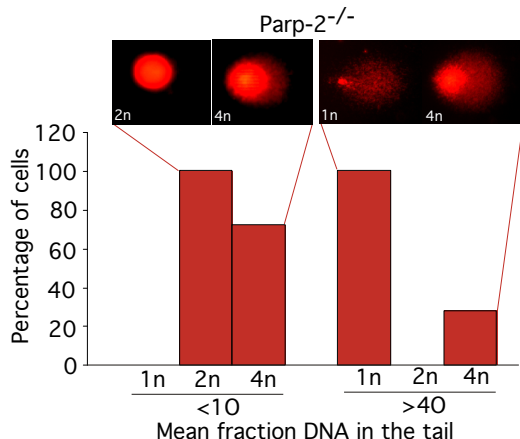

Supplement: pnas_0604252103_2.pdf [file pnas_0604252103_2.pdf]

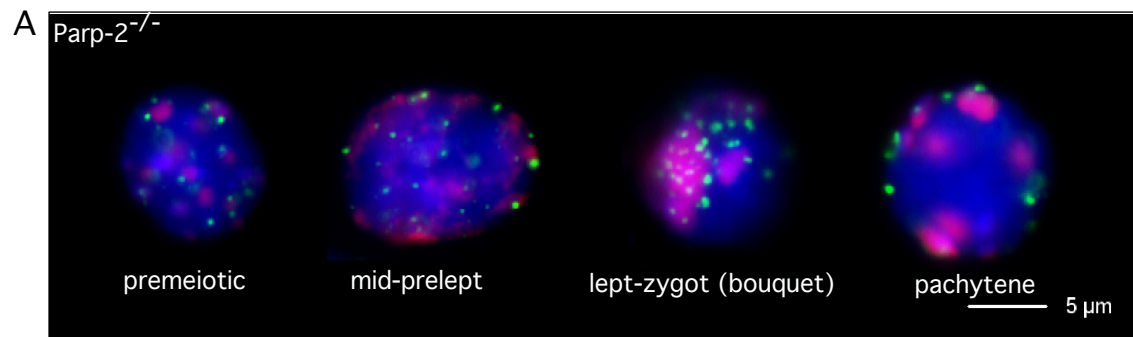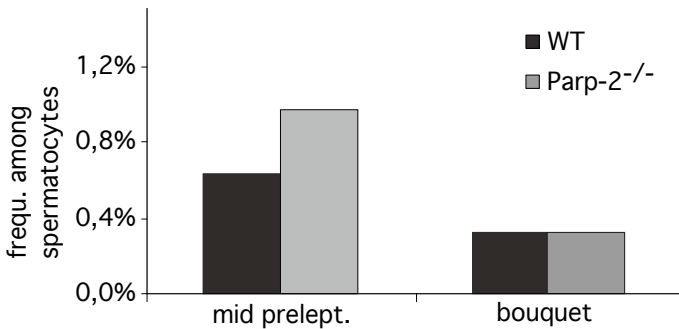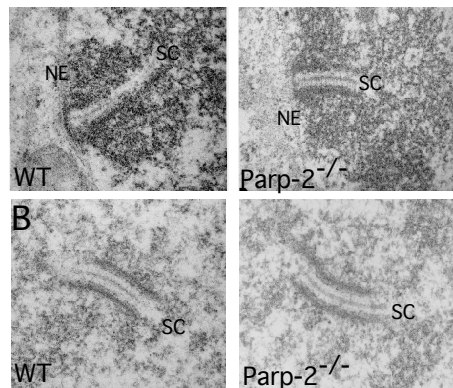

Supplement: pnas_0604252103_3.pdf [file pnas_0604252103_3.pdf]

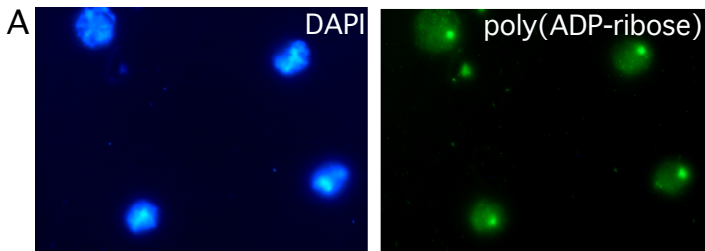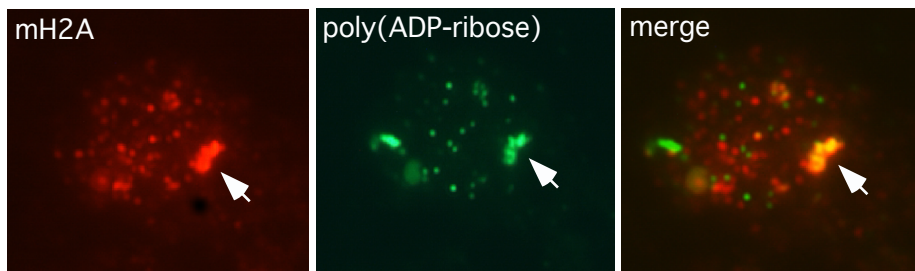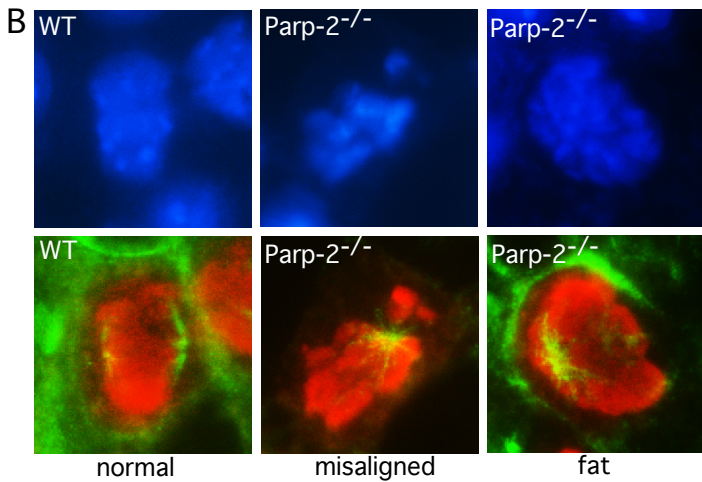

Supplement: pnas_0604252103_4.pdf [file pnas_0604252103_4.pdf]

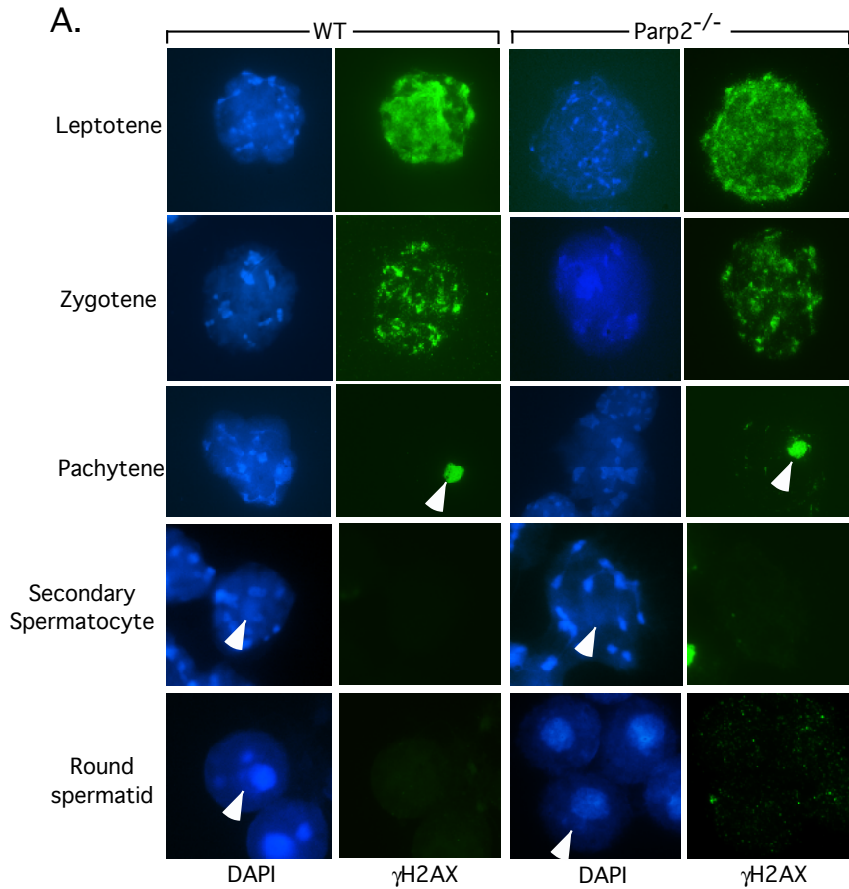

**B.**

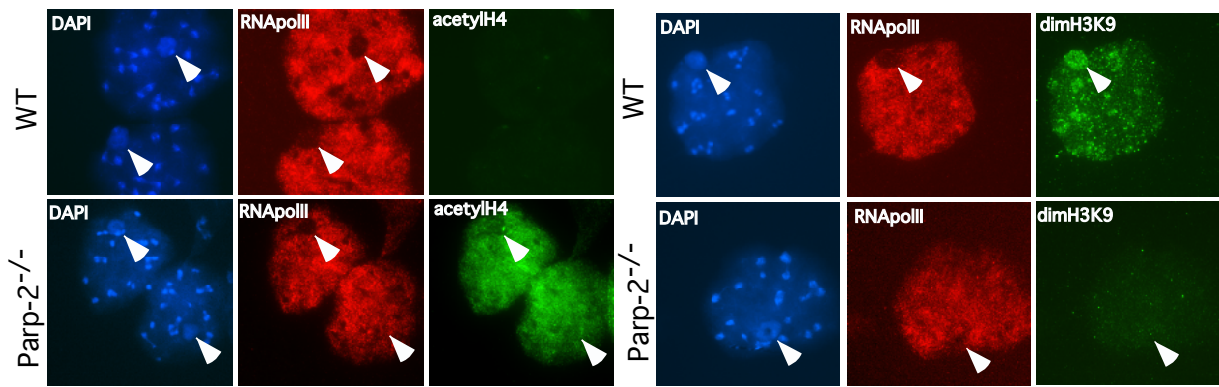

Supplement: pnas_0604252103_5.pdf [file pnas_0604252103_5.pdf]
